# Supplementary material for: Chemerin-induced macrophages pyroptosis in fetal brain tissue leads to cognitive disorder in offspring of diabetic dams
Source: PubMed Central journal article supplement (PMC6858779; doi:10.1186/s12974-019-1573-6), 2019-11-16

A

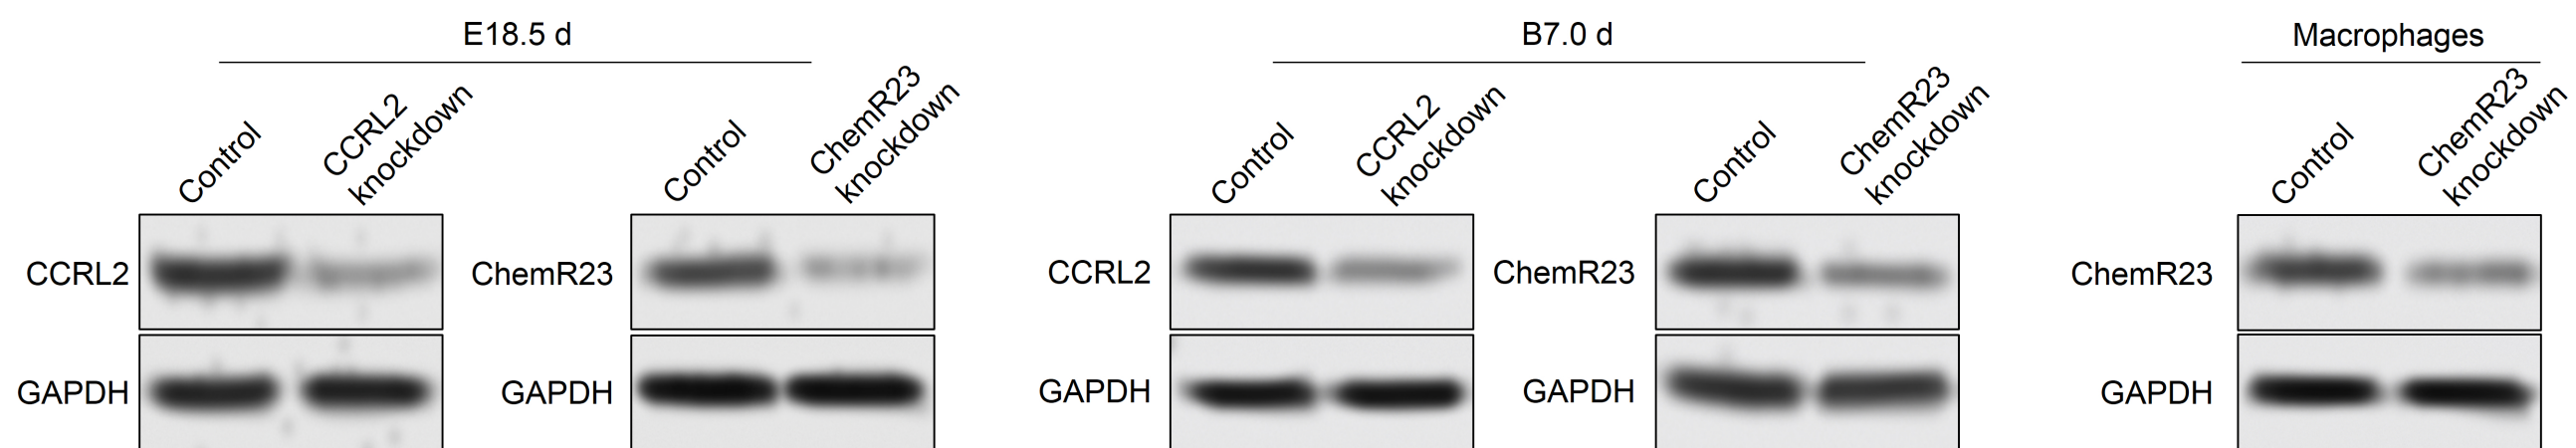

B

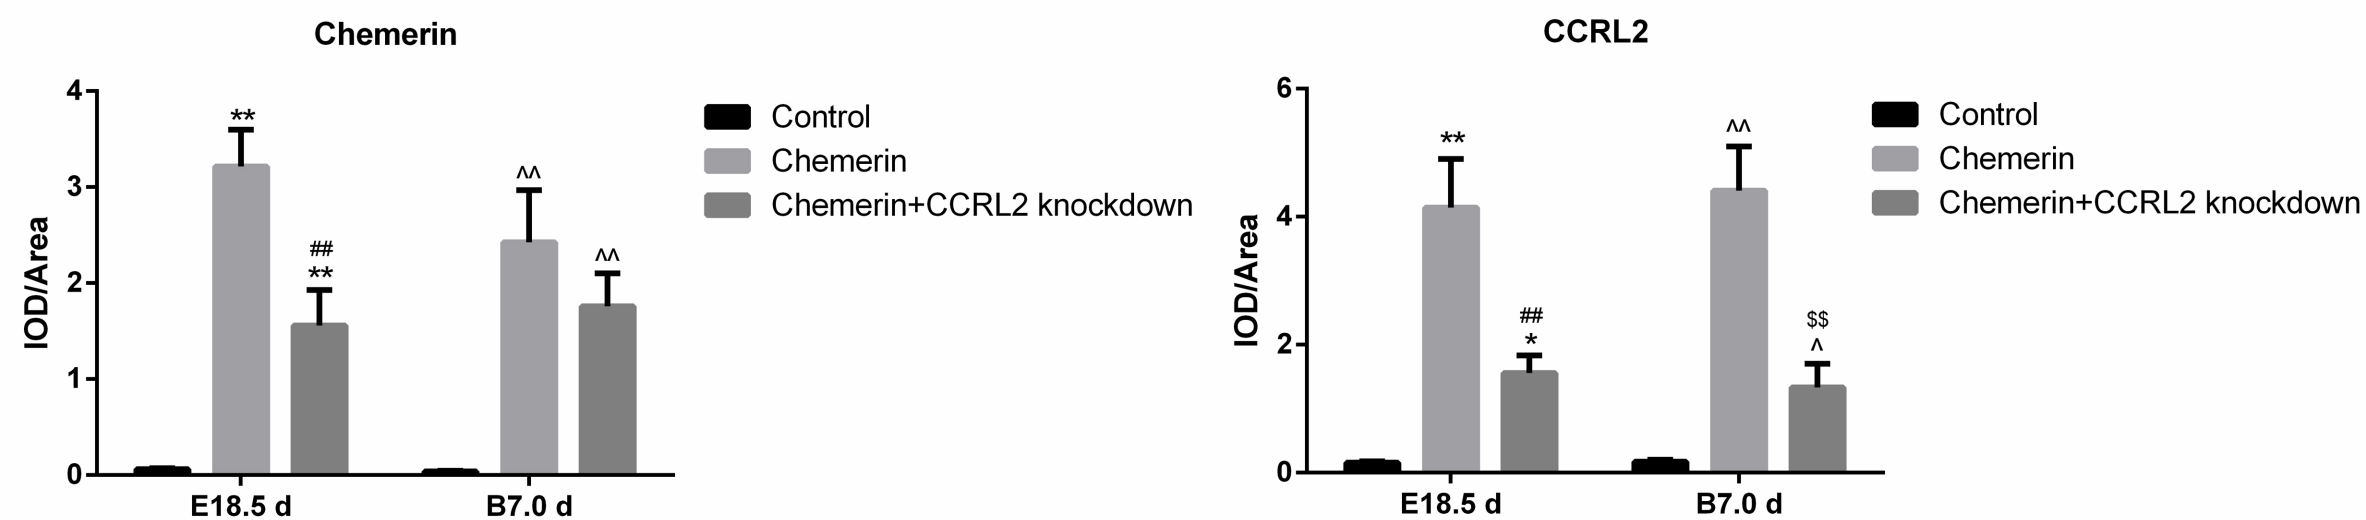

C

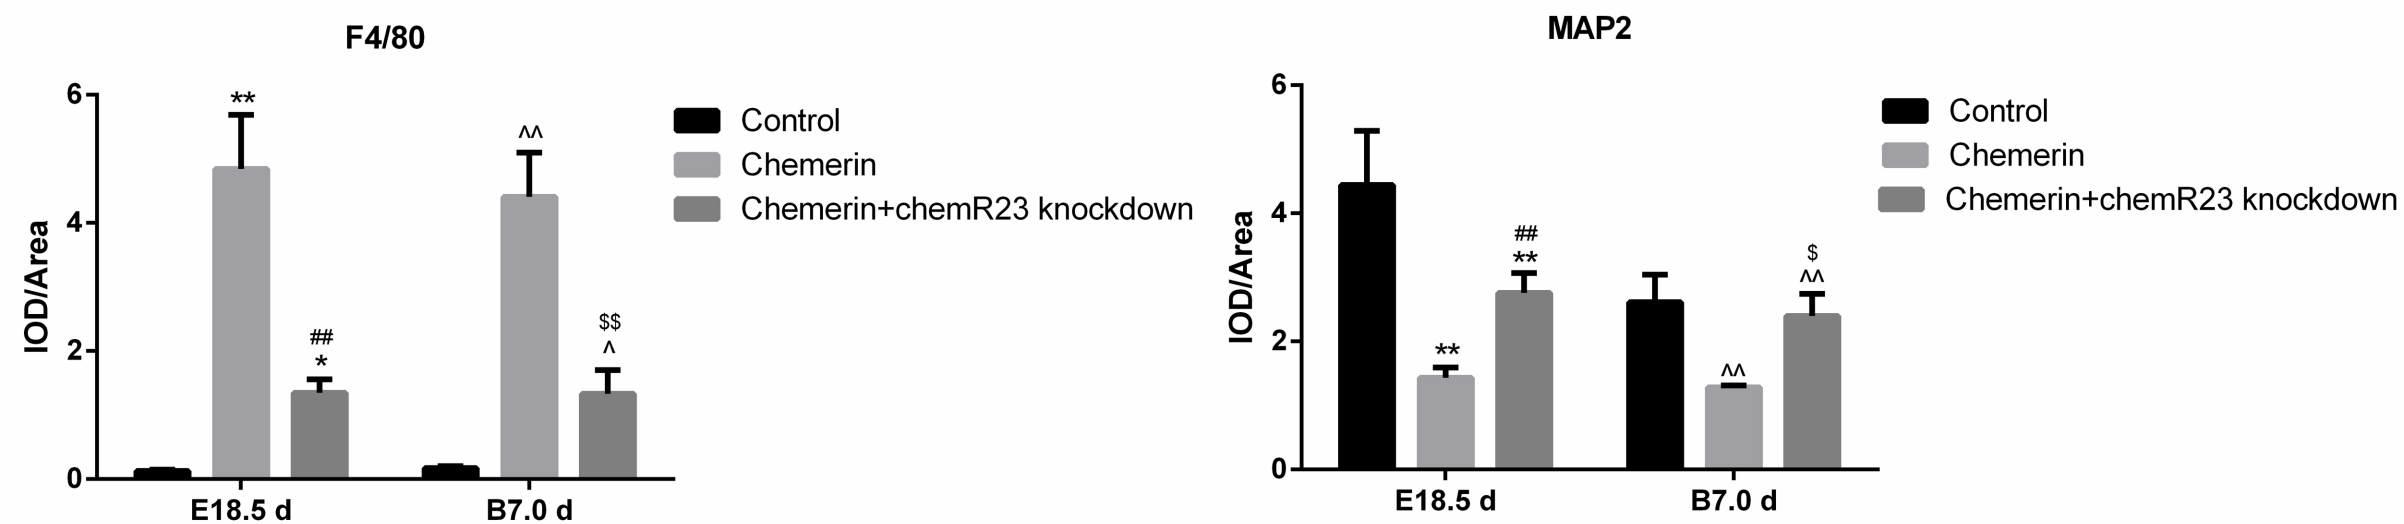

D

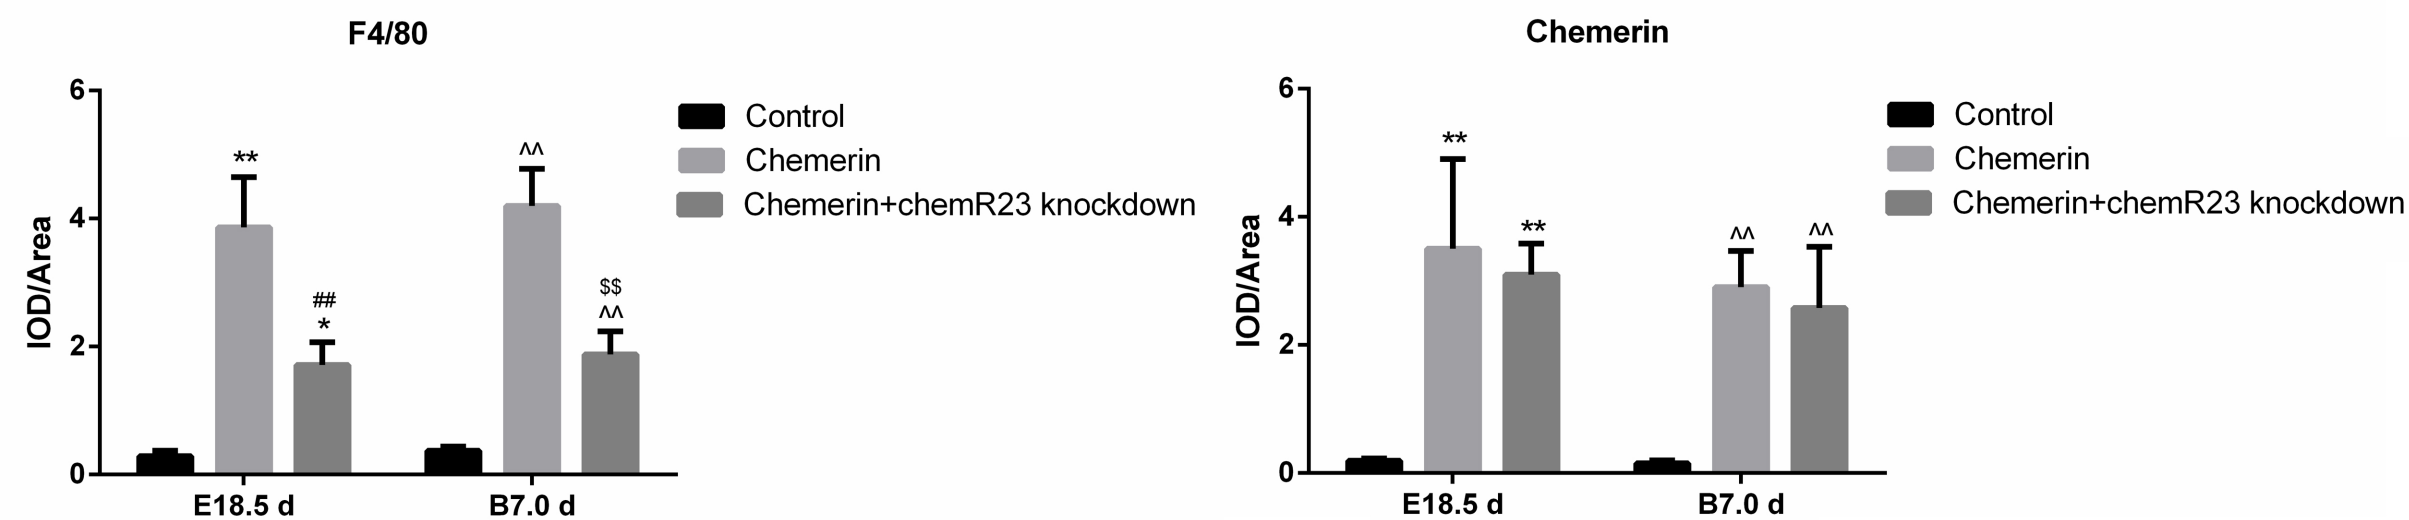

E

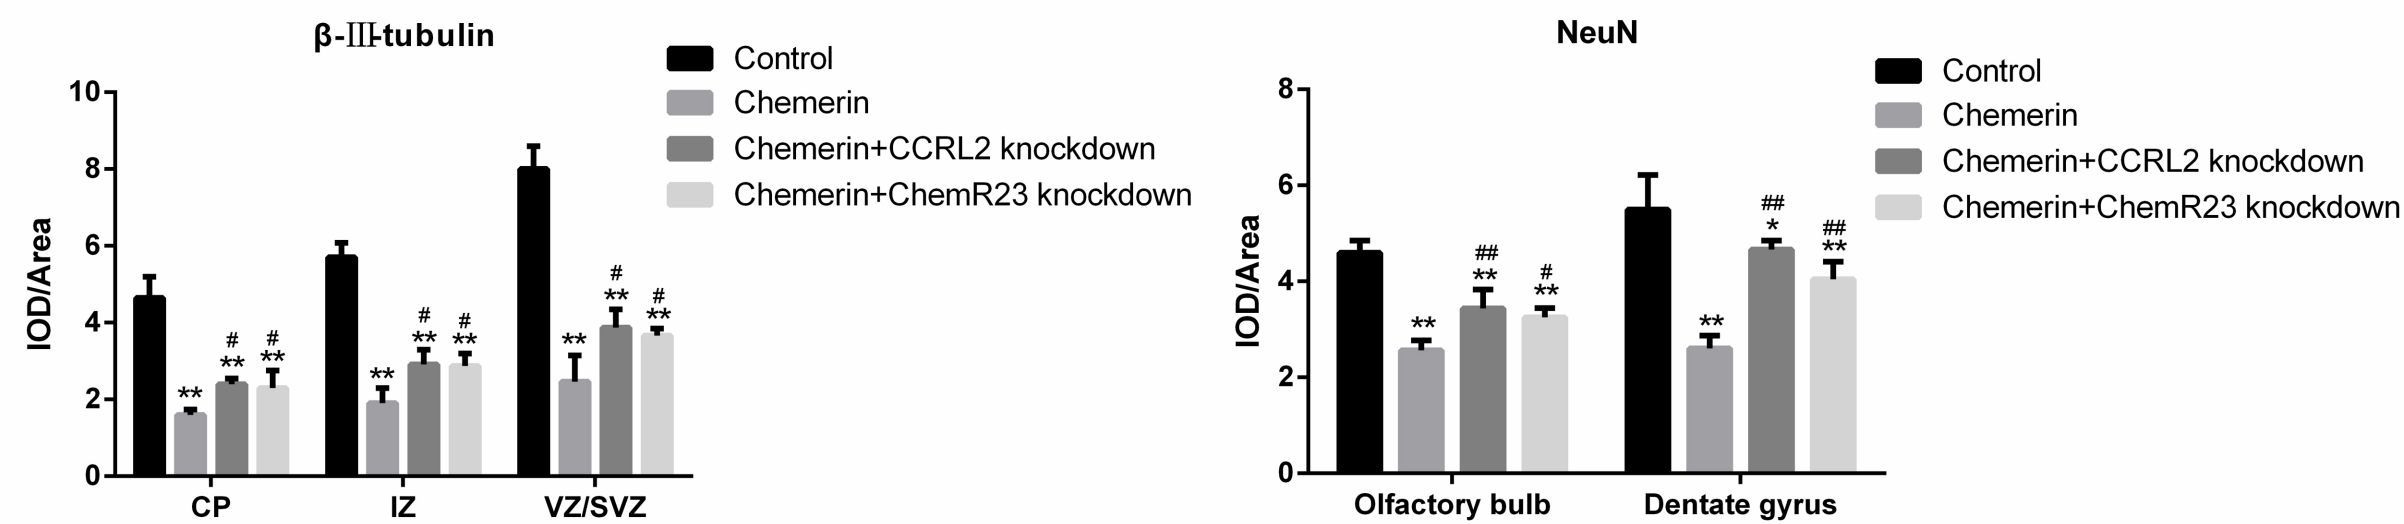

Supplement: 12974_2019_1573_MOESM2_ESM.pdf [file 12974_2019_1573_MOESM2_ESM.pdf]
